# Supplementary material
Source: MDPI journal article supplement (https://www.mdpi.com/2073-4344/14/1/70)
Supplement: s1 [file s1]

# Supporting Information

## Enhancing Catalytic Efficiency in Long-Chain Linear $\alpha$ -Olefin Epoxidation: A Study of $\text{CaSnO}_3$ -Based Catalysts

Min Zhang <sup>1,2,3</sup>, Hong-Wei Xiang <sup>1,2\*</sup> and Xiaodong Wen <sup>1,2,3\*</sup>

<sup>1</sup> State Key Laboratory of Coal Conversion, Institute of Coal Chemistry, Chinese Academy of Sciences, Taiyuan 030001, China; wxd@sxicc.ac.cn (D.X.); hwxiang@sxicc.ac. (W.H.); zhangmin@sxicc.ac.cn (M.Z.)

<sup>2</sup> National Energy Center for Coal to Clean Fuels, Synfuels China Technology Co., Ltd., Beijing 101400, China; wxd@sxicc.ac.cn (D.X.); hwxiang@sxicc.ac. (W.H.); zhangmin@sxicc.ac.cn (M.Z.)

<sup>3</sup> School of Chemical Engineering, University of Chinese Academy of Sciences, Beijing 100049, China; wxd@sxicc.ac.cn (D.X.); zhangmin@sxicc.ac.cn (M.Z.)

\* Correspondence: Correspondence: wxd@sxicc.ac.cn; hwxiang@sxicc.ac.cn

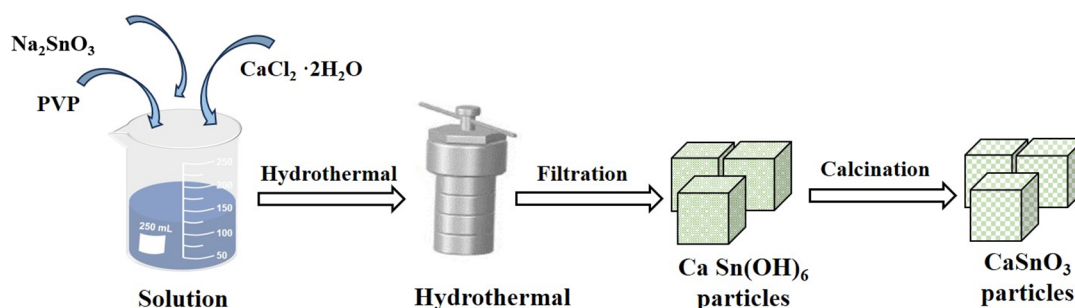

**Scheme S1.** The diagram of the synthesis of  $\text{CaSnO}_3$  catalyst.

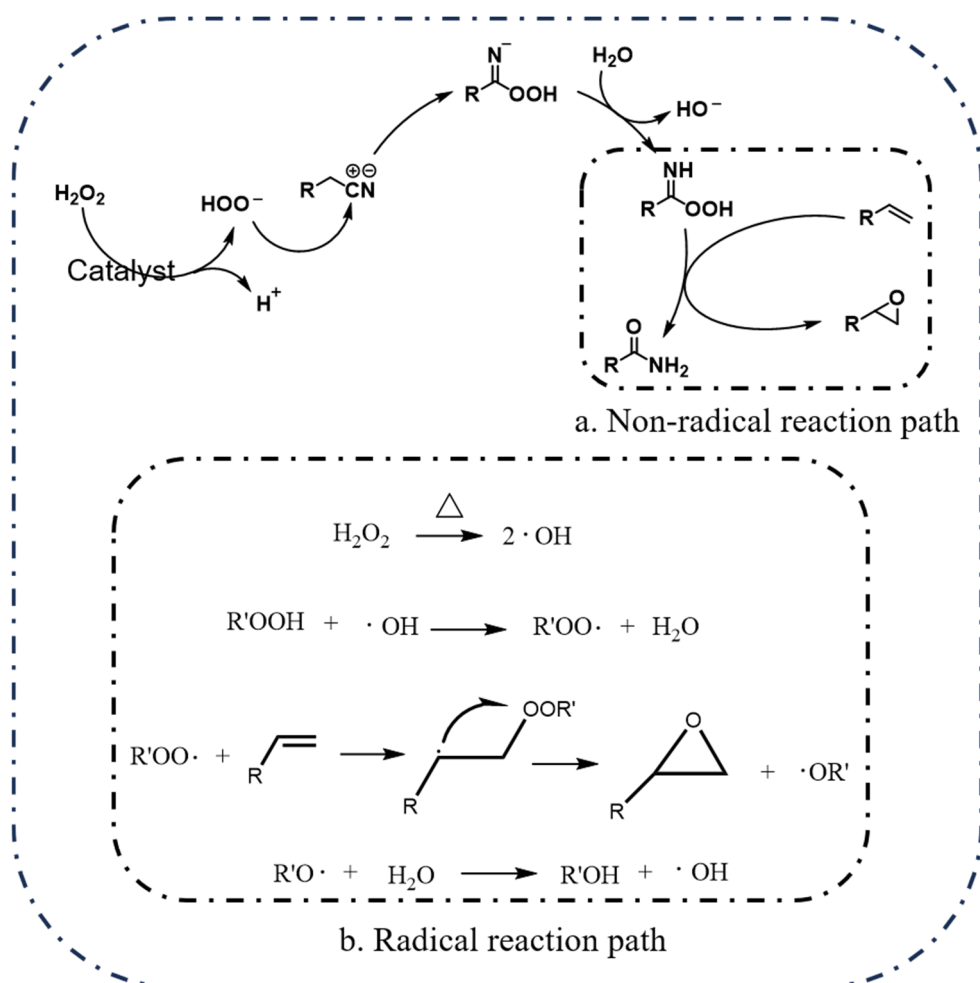

**Scheme S2.** Possible reaction mechanism of Payne's epoxidation.

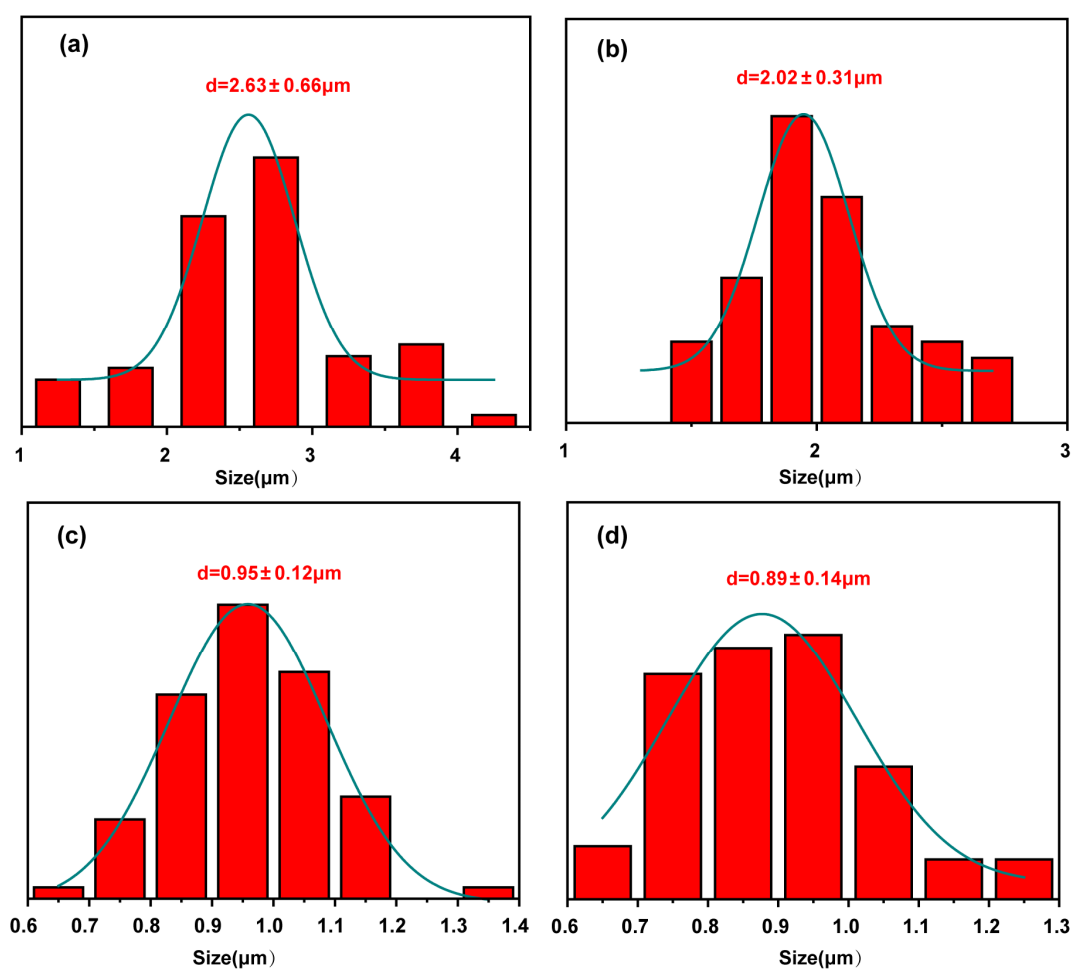

Figure S1. Particle size distribution of CS-1, CS-2, CS-3 and CS-4.

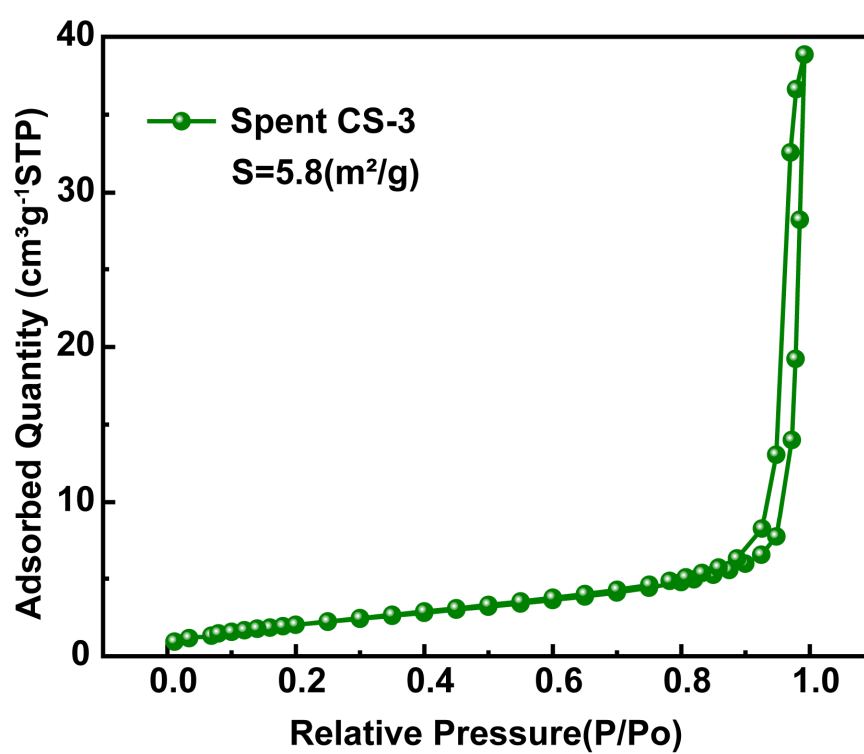

Figure S2. N<sub>2</sub> adsorption–desorption isotherms of the spent CS-3.

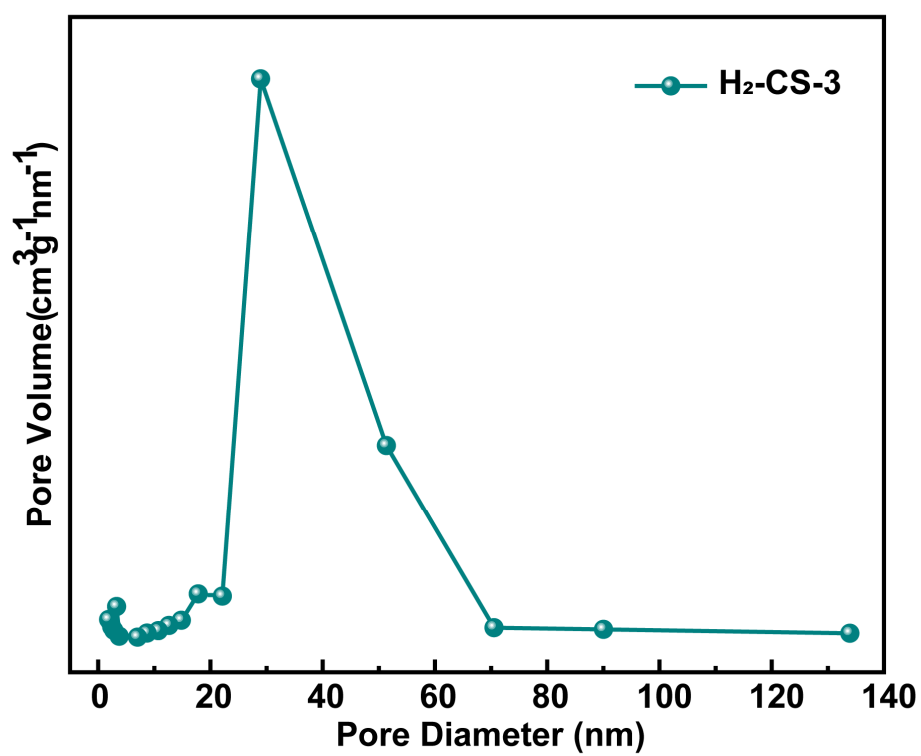

Figure S3. pore size distribution of H<sub>2</sub>-CS-3.

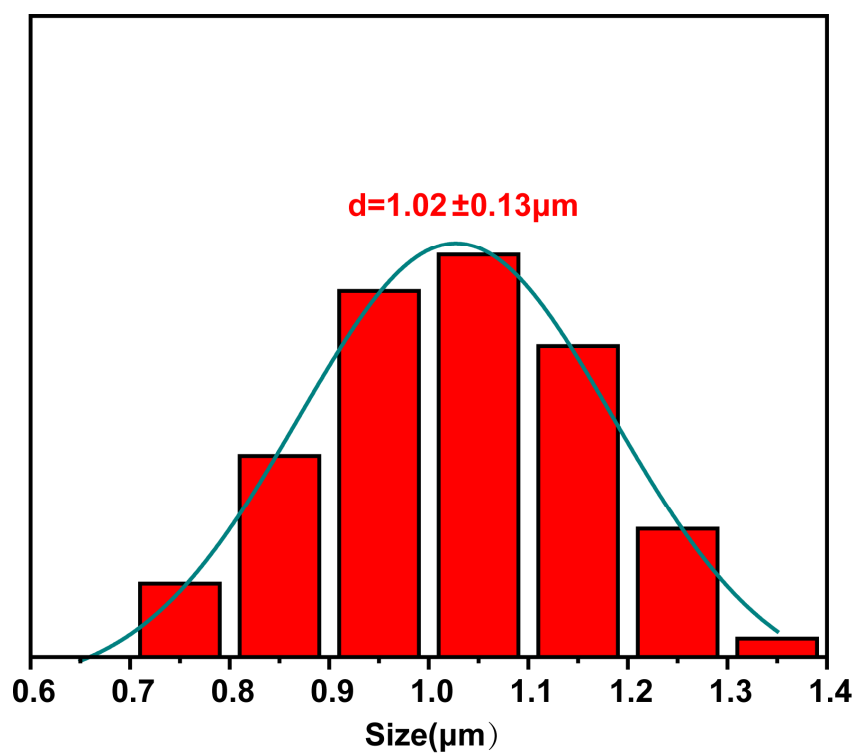

**Figure S4.** Particle size distribution of H<sub>2</sub>-CS-3.

**Table S1.** The amount of CO<sub>2</sub> desorption from the different type of CaSnO<sub>3</sub> catalyst.

| The amount of CO <sub>2</sub> desorption from each type of site<br>(mmol g <sub>catalyst</sub> <sup>-1</sup> ) and their fraction (%) |       |        |        |                                                               |
|---------------------------------------------------------------------------------------------------------------------------------------|-------|--------|--------|---------------------------------------------------------------|
| Sample                                                                                                                                | Weak  | Medium | Strong | Total basic sites (mmol g <sub>catalyst</sub> <sup>-1</sup> ) |
| CS-1                                                                                                                                  | 0.021 | 0.069  | 0.009  | 0.099                                                         |
| CS-2                                                                                                                                  | 0.017 | 0.073  | 0.026  | 0.116                                                         |
| CS-3                                                                                                                                  | 0.017 | 0.080  | 0.024  | 0.121                                                         |
| H <sub>2</sub> -CS-3                                                                                                                  | 0.017 | 0.088  | 0.025  | 0.130                                                         |

**Table S2.** Binding energy and relative area percentage of oxygen species in CS-1, CS-2, CS-3, H2-CS-3.

| Catalyst             | O1s binding energy(eV) |                |                  | Relative area (%) |                |                  | V <sub>o</sub> ratio                                                     |
|----------------------|------------------------|----------------|------------------|-------------------|----------------|------------------|--------------------------------------------------------------------------|
|                      | O <sub>lat</sub>       | O <sub>v</sub> | O <sub>ads</sub> | O <sub>lat</sub>  | O <sub>v</sub> | O <sub>ads</sub> | O <sub>v</sub> / (O <sub>lat</sub> + O <sub>v</sub> + O <sub>ads</sub> ) |
| CS-1                 | 529.91                 | 531.86         | 532.90           | 77.5              | 16.3           | 6.2              | 0.16                                                                     |
| CS-2                 | 529.90                 | 531.86         | 532.90           | 60.3              | 27.7           | 12.0             | 0.28                                                                     |
| CS-3                 | 529.90                 | 531.87         | 532.90           | 60.6              | 30.9           | 8.4              | 0.31                                                                     |
| H <sub>2</sub> -CS-3 | 530.10                 | 532.0          | 533.1            | 59.2              | 33.2           | 7.6              | 0.33                                                                     |



**Table S3.** Structural parameters of CS-1, CS-2, CS-3 and CS-4.

| Catalyst             | S(m <sup>2</sup> /g) | V(cm <sup>3</sup> /g) | D (μ m) |
|----------------------|----------------------|-----------------------|---------|
| CS-1                 | 4.8                  | 0.05                  | 2.63    |
| CS-2                 | 5.3                  | 0.05                  | 2.02    |
| CS-3                 | 5.9                  | 0.05                  | 0.95    |
| CS-4                 | 5.9                  | 0.05                  | 0.89    |
| H <sub>2</sub> -CS-3 | 6.1                  | 0.05                  | 1.02    |
